# Supplementary material for: Polyoxometalate-based gasochromic silica
Source: Royal Society of Chemistry journal article supplement (doi:10.1039/b801764f), 2008-01-01
Supplement: b801764f.pdf [file b801764f.pdf]

Supplementary Material

**Polyoxometalate-based gasochromic silica pieces**

Bingbing Xu, Lin Xu,\* Guanggang Gao, Zhikui Li, Yu Liu, Weihua Guo and Liping Jia

Key Laboratory of Polyoxometalates Science of Ministry of Education, College of Chemistry, Northeast Normal University, Changchun 130024, P. R. China. E-mail: [linxu@nenu.edu.cn](mailto:linxu@nenu.edu.cn); Fax: +86 431 509 9668; Tel: +86 431 509 9668

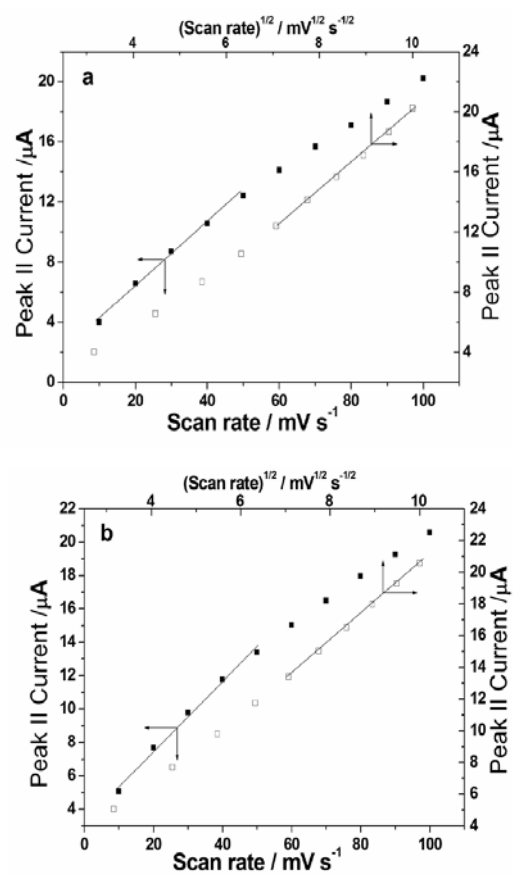

**Fig. S 1** The dependence of cathodic peak currents [I<sub>pc</sub>(II)] on scan rates (black square marks) and the square roots of scan rates (white square marks) for PMO<sub>12</sub> aqueous-modified electrode (a) and PMO<sub>12</sub> sol-modified electrode (b).

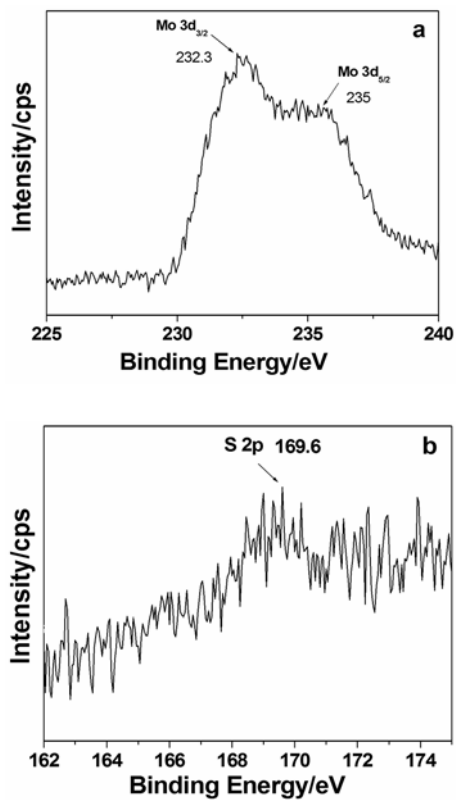

**Fig. S 2** (a) Molybdenum atom peaks (Mo 3d<sub>3/2</sub> and Mo 3d<sub>5/2</sub>), (b) sulphur atom peak (S 2p) in the X-ray photoelectron spectra for the silica after exposure to SO<sub>2</sub>

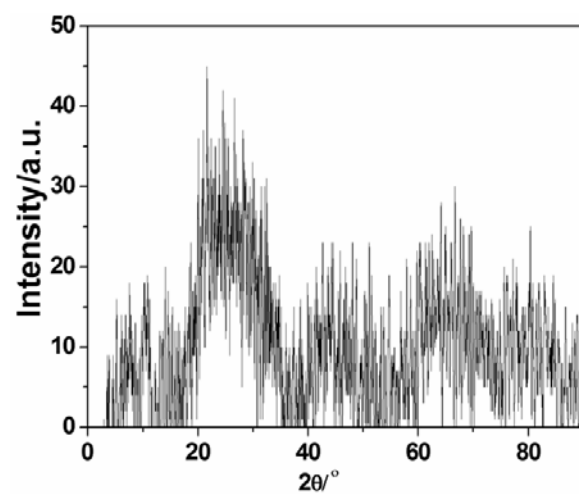

**Fig. S 3** X-Ray diffraction pattern of  $\text{PMO}_{12}$ - $\text{SiO}_2$  hybrid material.

**Table S1** Main relevant IR data observed for  $\text{H}_3\text{PMo}_{12}\text{O}_{40}$  and  $\text{PMo}_{12}\text{-SiO}_2$  hybrid material.

| Assignment                 | $\sigma(\text{cm}^{-1})$   |                                           |                                           |
|----------------------------|----------------------------|-------------------------------------------|-------------------------------------------|
|                            | $\text{PMo}_{12}$          | $\text{PMo}_{12}\text{-SiO}_2^{\text{a}}$ | $\text{PMo}_{12}\text{-SiO}_2^{\text{b}}$ |
| <b>Mo-O<sub>b</sub>-Mo</b> | 784 (760-800) <sup>c</sup> | 793                                       | 792                                       |
| <b>Mo-O<sub>c</sub>-Mo</b> | 869 (840-910)              | 884                                       | 883                                       |
| <b>Mo-O<sub>d</sub></b>    | 962 (960-1000)             | 963                                       | 960                                       |
| <b>P-O<sub>a</sub></b>     | 1065 (1060-1080)           | 1070 <sup>d</sup>                         | 1063 <sup>d</sup>                         |

<sup>a</sup>Before exposure to  $\text{H}_2\text{S}$  gas. <sup>b</sup>After exposure to  $\text{H}_2\text{S}$  gas. <sup>c</sup>Values in parentheses show the range of frequencies found in the literature.  
<sup>d</sup>May also originate from Si-O-Si vibrations in silica framework.
